# Supplementary material
Source: PubMed Central journal article supplement (PMC7015310)
Supplement: rsta20180431supp1.pdf [file rsta20180431supp1.pdf]

## Chemical and isotopic analyses of hydrocarbon-bearing fluid inclusions in olivine-rich rocks

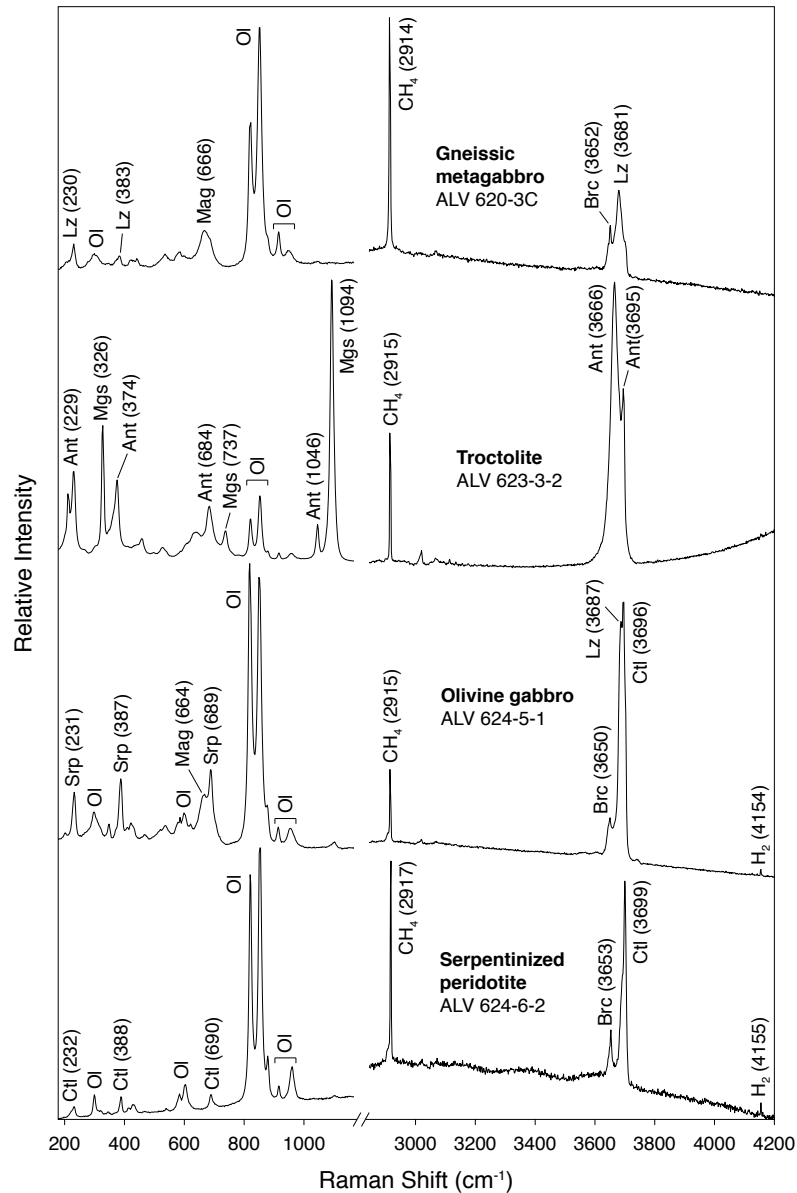

**Supplemental Figure S1.** Representative Raman spectra of olivine-hosted secondary fluid inclusions in samples from the Mid-Cayman Rise. Raman band positions for olivine are removed for clarity. Mineral abbreviations: Ant - antigorite, Brc - brucite, Ctl - chrysotile, Lz - lizardite, Mag - magnetite, Mgs - magnesite, Ol - olivine, Srp - serpentine.

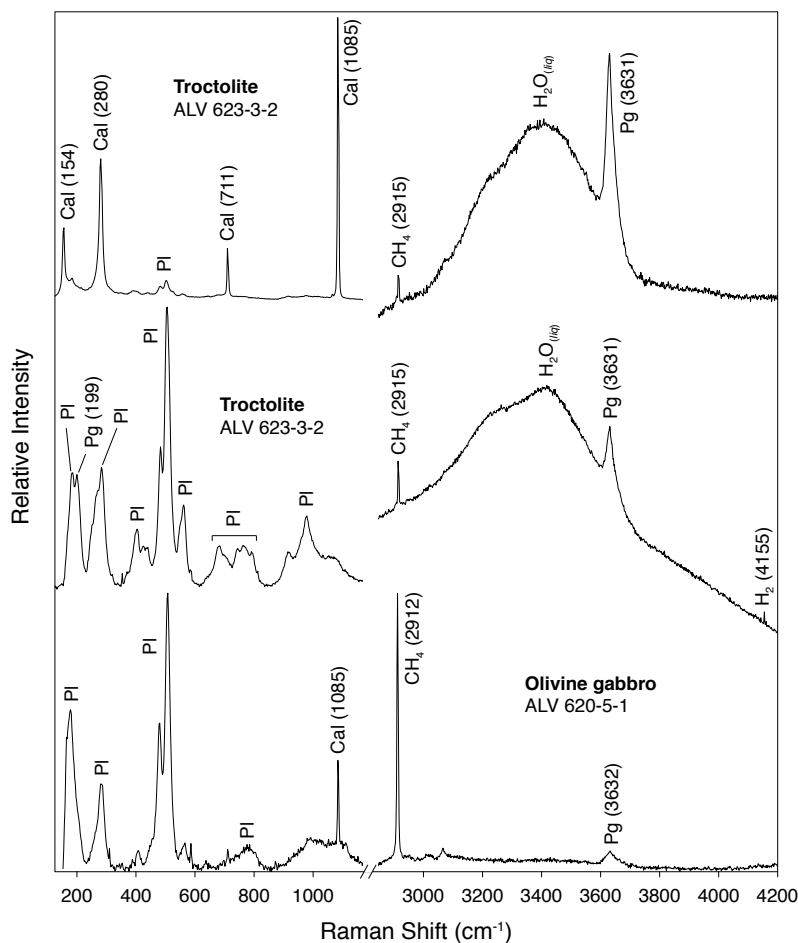

**Supplemental Figure S2.** Representative Raman spectra of plagioclase-hosted secondary fluid inclusions in samples from the Mid-Cayman Rise. Raman band positions for plagioclase are removed for clarity. Mineral abbreviations: Cal - calcite, Pg - paragonite, PI - plagioclase.

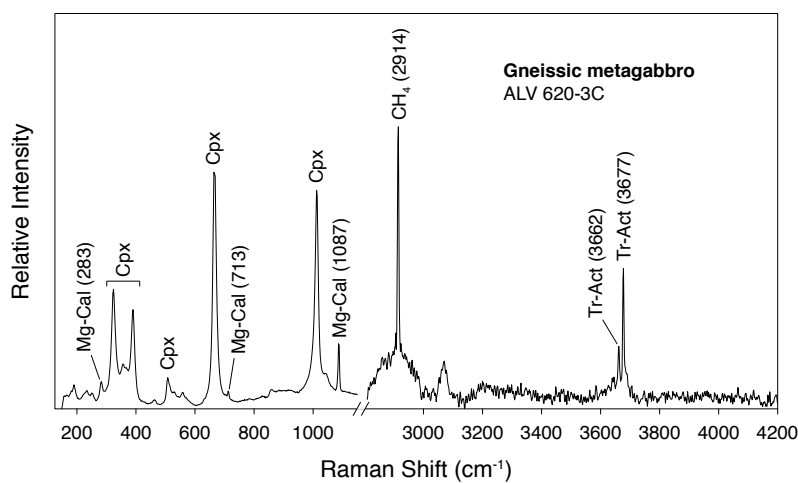

**Supplemental Figure S3.** Representative Raman spectrum of a clinopyroxene-hosted secondary fluid inclusion in the gneissic metagabbro sample ALV 620-3C from the Mid-Cayman Rise. Raman band positions for clinopyroxene are removed for clarity. Mineral abbreviations: Cpx - clinopyroxene, Mg-Cal - Mg-calcite, Tr-Act - tremolite-actinolite.

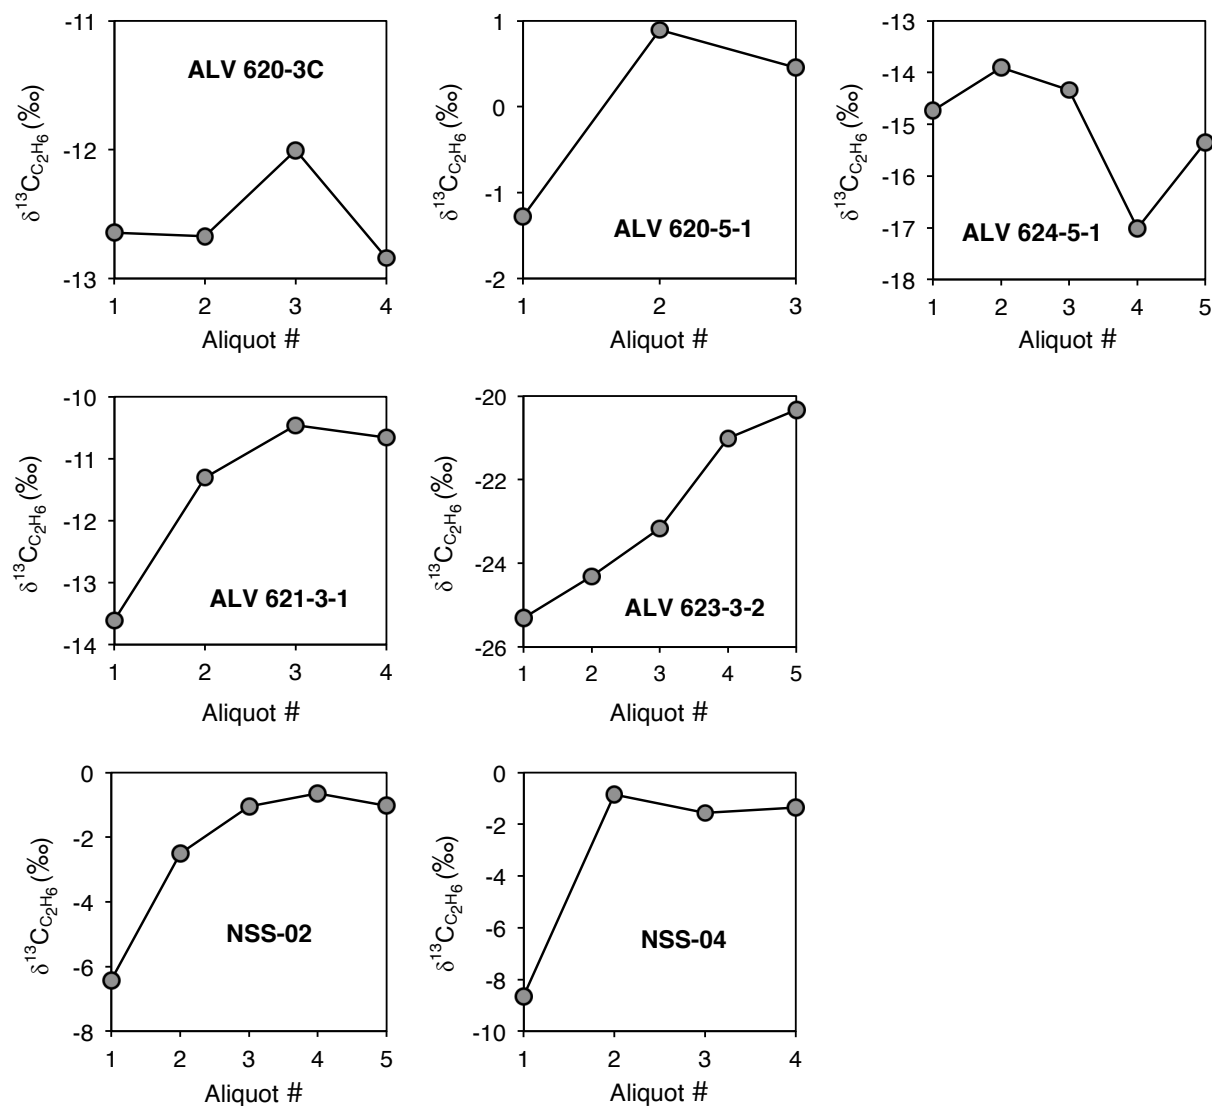

**Supplemental Figure S4.** Plots showing the changes in  $\delta^{13}\text{C}_{\text{C}_2\text{H}_6}$  values with replicate analyses of the same sample. Most samples from the Mid-Cayman Rise and Zambales ophiolite exhibit more  $^{13}\text{C}$ -depleted  $\text{C}_2\text{H}_6$  in the first sample aliquots, which may be attributed to the production of isotopically light  $\text{C}_2\text{H}_6$  from the crushing device.

**Supplementary Table S1.**

Hydrocarbon abundances from blank measurements.

| Blank material        | $\text{CH}_4$ |           | $\text{C}_2\text{H}_6$ |           | $\text{CH}_4/\text{C}_2\text{H}_6$ |           |
|-----------------------|---------------|-----------|------------------------|-----------|------------------------------------|-----------|
|                       | Avg (nmol/g)  | $2\sigma$ | Avg (nmol/g)           | $2\sigma$ | Avg                                | $2\sigma$ |
| Combusted Pyrex beads | 0.07          | 0.03      | 0.0017                 | -         | 58                                 | -         |
| Combusted ALV 621-3-1 | 0.45          | 0.18      | 0.0007                 | 0.0002    | 656                                | 109       |
| Combusted ALV 623-3-2 | 0.09          | 0.08      | <i>bdl</i>             |           |                                    |           |
| Combusted ALV 624-3-3 | 0.04          | 0.05      | <i>bdl</i>             |           |                                    |           |

*bdl* – below detection limit
